# Supplementary material for: Oncolytic Adenovirus for the Targeting of Paclitaxel-Resistant Breast Cancer Stem Cells
Source: MDPI journal article supplement (doi:10.3390/v16040567), 2024-04-05
Supplement: s1 [file s1]

# Oncolytic Adenovirus for the Targeting of Paclitaxel-Resistant Breast Cancer Stem Cells

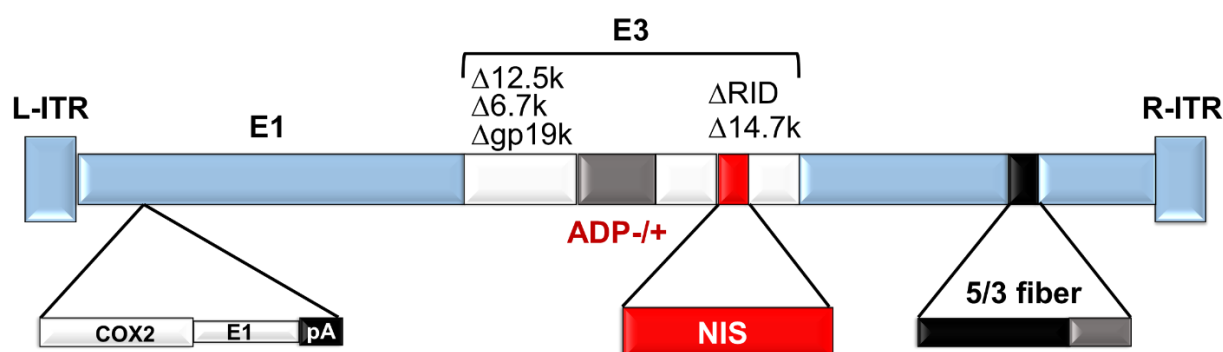

**Figure S1.** Adenovirus vector modifications for improved breast cancer cells infectivity. Constructs are based on adenovirus type 5 (Ad5) backbone and include deletion of the 12.5K, 6.7K, gp19K, RID- $\alpha$ , RID- $\beta$ , and 14.7K genes from the E3 region. The Adenovirus Death Protein (ADP) gene was removed from “ADP(-)” vectors set. The vectors are equipped with the Ad5/Ad3-modified fiber to overcome Cocksackie and Ad Receptor (CAR) deficiency and a Cox-2 promoter to restrict replication and gene expression to permissive tumors.

**Table S1.** Significance of Cox-2-controlled promoter killing ability compared to WT OAd. The statistical significance was determined by a Student’s t-test with a Mann-Whitney post hoc analysis. \*  $p < 0.05$ . p.i.: post-infection.

| Time p.i. | Titer (pfu/cell) | ADP Expression | A549        | MCF-7       | AU565       | MDA-MB-468  | MDA-MB-231  |
|-----------|------------------|----------------|-------------|-------------|-------------|-------------|-------------|
| d3        | 10               | +              | * (WT>COX2) |
|           |                  | -              | ns          | ns          | * (WT>COX2) | * (WT>COX2) | ns          |
|           | 1                | +              | * (WT>COX2) |
|           |                  | -              | ns          | ns          | * (WT>COX2) | * (WT>COX2) | ns          |
|           | 0.1              | +              | ns          | * (WT>COX2) | * (WT>COX2) | * (WT>COX2) | ns          |
|           |                  | -              | ns          | ns          | * (WT>COX2) | ns          | * (WT>COX2) |
| d5        | 10               | +              | ns          | * (WT>COX2) | ns          | * (WT>COX2) | ns          |
|           |                  | -              | ns          | * (WT>COX2) | ns          | * (WT>COX2) | ns          |
|           | 1                | +              | * (WT>COX2) |
|           |                  | -              | ns          | ns          | * (WT>COX2) | * (WT>COX2) | * (WT>COX2) |
|           | 0.1              | +              | * (WT>COX2) |
|           |                  | -              | ns          | * (WT>COX2) | * (WT>COX2) | * (WT>COX2) | * (WT>COX2) |
| d7        | 10               | +              | ns          | * (WT>COX2) | * (WT>COX2) | * (WT>COX2) | ns          |
|           |                  | -              | ns          | * (WT>COX2) | ns          | * (WT>COX2) | ns          |
|           | 1                | +              | * (WT>COX2) |
|           |                  | -              | ns          | * (WT>COX2) | * (WT>COX2) | * (WT>COX2) | ns          |
|           | 0.1              | +              | * (WT>COX2) |
|           |                  | -              | * (WT>COX2) |
